# Supplementary material for: Perovskite-derived structure modulation in the iron sulfate family
Source: Royal Society of Chemistry journal article supplement (doi:10.1039/d2cc02242g), 2022-01-01
Supplement: d2cc02242g1.pdf [file d2cc02242g1.pdf]

Supporting Information for

# Perovskite-derived structure modulation in the iron sulfate family

*Yuanqi Lan<sup>a,b†</sup>, Qi Yan<sup>a,c†</sup>, Xinyuan Zhang<sup>d</sup>, Wenjiao Yao<sup>a\*</sup>, Chenchen Wang<sup>e</sup>, Chun-sing Lee<sup>e</sup>, Philip Lightfoot<sup>f\*</sup>, Yongbing Tang<sup>a,b\*</sup>*

<sup>a</sup> Advanced Energy Storage Technology Research Center, Shenzhen Institutes of Advanced Technology, Chinese Academy of Sciences, Shenzhen, 518055, China

<sup>b</sup> School of Chemical Science, University of Chinese Academy of Sciences, Beijing 100049, China

<sup>c</sup> Nano Science and Technology Institute, University of Science and Technology of China, Suzhou, 215123, China

<sup>d</sup> Tianjin Key Laboratory of Functional Crystal Materials, Institute of Functional Crystals, Tianjin University of Technology, Tianjin, 300384, China

<sup>e</sup> Center of Super - Diamond and Advanced Films and Department of Chemistry, City University of Hong Kong, Hong Kong SAR, 999077, P. R. China

<sup>f</sup> School of Chemistry, University of St Andrews, St Andrews, Fife KY16 9ST, UK

<sup>†</sup>Y.Q. Lan and Q. Yan equally contributed to this work.

\* Corresponding authors: [wj.yao@siat.ac.cn](mailto:wj.yao@siat.ac.cn); [pl@st-andrews.ac.cn](mailto:pl@st-andrews.ac.cn); [tangyb@siat.ac.cn](mailto:tangyb@siat.ac.cn)

**KEYWORDS:** sulfates, perovskite, crystal structure.

## Table of Content

1. Experimental Procedures
2. Figure S1. Structural illustration of *I*.
3. Figure S2. Structural illustration of *II*.
4. Table S1. Crystallographic information of crystal *I*, *II* and *III*.
5. Table S2. Atomic parameters of crystal *I*.
6. Table S3. Atomic parameters of crystal *II*.
7. Table S4. Atomic parameters of crystal *III*.
8. Figure S3. Photos of crystallites of *I*, *II* and *III*.
9. Figure S4. Basic characterisation of crystal *I*.
10. Figure S5. Basic characterisation of crystal *I*.
11. Figure S6. Basic characterisation of crystal *I*.
12. Figure S7. Fe environment in *I*, *II*, and *III*.

## Experimental Procedures

### Materials

Iron (II) chloride tetrahydrate ( $\text{FeCl}_2 \cdot 4\text{H}_2\text{O}$ , 99.0%, AR), iron (II) sulfate heptahydrate ( $\text{FeSO}_4 \cdot 7\text{H}_2\text{O}$ , 99.0%, AR), oxalic acid dihydrate ( $\text{H}_2\text{C}_2\text{O}_4 \cdot 2\text{H}_2\text{O}$ , 99.5%, AR), sodium carbonate anhydrate ( $\text{Na}_2\text{CO}_3$ , 99.8%, GR), sodium perchlorate ( $\text{NaClO}_4$ , 99.99%, metal basis), sodium sulfate anhydrate ( $\text{Na}_2\text{SO}_4$ , AR, 99.0%), sodium metal, and hydrofluoric acid (HF, AR, 40%) were purchased from Shanghai Aladdin Bio-Chem technology Co., Ltd. Sulfuric acid ( $\text{H}_2\text{SO}_4$ , AR, 98%) was purchased from Dongjiang Reagent. Glass microfiber filter used as separator (Whatman, GF/A, 125 mm), battery-grade propylene carbonate (PC) and 4-fluoro-1,3-dioxolan-2-one fluoroethylene carbonate (FEC) were purchased from Suzhou Dodochem Technology Co., Ltd. Super-P used for conductive reagent and N-methyl-2-pyrrolidone (NMP) were purchased from Guangdong Canrd New Energy Technology Co., Ltd. Aluminium (Al) foil (thickness of 20  $\mu\text{m}$ ) and polyvinylidene fluoride (PVDF) binder was purchased from Shenzhen Kejing Star technology company. All reagents were used directly without further treatment.

### Synthesis

Single crystals of  $\text{Na}_3\text{Fe}(\text{SO}_4)_3 \cdot \text{H}_2\text{O}$  (*I*) were synthesised by a hydrothermal method. Reactants with ratio of  $\text{Na}_2\text{SO}_4:\text{FeSO}_4 \cdot 7\text{H}_2\text{O} = 1:1$  (1 for 1 mmol) were dissolved in the mixture of 0.5 mL deionized water and 70  $\mu\text{L}$   $\text{H}_2\text{SO}_4$  (~1.3 mmol). The mixture of reactants was transferred into a 25 mL Teflon-lined stainless-steel autoclave, heated to 190 °C and maintained for three days in an oven. The yellow cubic single

crystals were picked out, washed by deionised water and dried at 65 °C for 1 hour. The obtained crystals were stored in a sealed container with dry silica gel.

Single crystals of  $\text{Na}_6\text{Fe}(\text{SO}_4)_4$  (**II**) were synthesised by a hydrothermal method. Reactants with ratio of  $\text{H}_2\text{C}_2\text{O}_4 \cdot 2\text{H}_2\text{O}:\text{Na}_2\text{SO}_4:\text{FeCl}_2 \cdot 4\text{H}_2\text{O} = 5:4:2$  (1 for 1 mmol) were dissolved in 0.5 mL deionised water. The mixture of reactants was then transferred into a 20 mL Teflon-lined stainless-steel autoclave, heated to 200 °C and maintained for 3 days in an oven. The light yellow rhombic single crystals were picked out, washed by deionised water and dried at 65 °C for 1 hour. The obtained crystals are stable in air.

Single crystals of  $\text{Na}_{12}\text{Fe}_3(\text{SO}_4)_6\text{F}_8$  (**III**) were synthesised by a hydrothermal method. 2 mmol  $\text{FeCl}_2 \cdot 4\text{H}_2\text{O}$  was firstly added into 200  $\mu\text{L}$  HF (~4 mmol) in a fume cupboard. 54  $\mu\text{L}$   $\text{H}_2\text{SO}_4$  (~1 mmol) was diluted gently into 0.5 mL deionised water. The two solutions were then mixed and transferred into a 25 mL Teflon-lined stainless-steel autoclave. Finally, 2.4 mmol  $\text{Na}_2\text{CO}_3$  was added into the obtained mixture, and the release of gas was immediately observed. When no further gas generation was seen, the autoclave was sealed, heated to 170 °C and maintained for 3 days in an oven. The light red granular crystals were picked out, washed by deionised water and dried in 65 °C for 1 hour. The obtained crystals are stable in air for around one week.

### **Characterization**

Structures of the three compounds were solved by single crystal X-ray diffraction (XRD). Diffraction data were collected at room temperature on a Rigaku AFC10 single-crystal diffractometer equipped with graphite-monochromated Mo  $K\alpha$  radiation ( $\lambda =$

0.71073 Å). The structures were then solved by direct methods and refined using SHELX-2014 incorporated in the WinGX program. Powder XRD patterns of hand-milled crystallites were recorded in a SmartLab Rigaku diffractometer, which was operated at 40 kV and 50 mA with Cu K $\alpha$  radiation ( $\lambda = 1.54056$  Å) in the  $2\theta$  range of 10°-90°. The Fourier transform infrared (FTIR) spectrum was recorded at room temperature by a Bruker INVENIO S FTIR spectrometer. The Raman spectrum was collected by a Horiba XploRA plus Raman microscope.

### **Electrochemical measurement**

The Na<sub>3</sub>Fe(SO<sub>4</sub>)<sub>3</sub>·H<sub>2</sub>O composite cathodes were made of active material, Super-P, and PVDF at the weight ratio of 6:3:1. Na<sub>3</sub>Fe(SO<sub>4</sub>)<sub>3</sub>·H<sub>2</sub>O from hydrothermal reactions was firstly ground by hand. The obtained powder was mixed with Super-P by ball milling for four hours, and then hand-ground with PVDF for 30 minutes. The whole mixture was ground with some NMP as dispersant to form a uniform slurry and coated on Al foil with a mass loading of approximately 1.5 mg cm<sup>-2</sup> active material and dried at 80 °C in vacuum overnight. The dried foil was cut into disk electrodes with a diameter of 10 mm. 1 M NaClO<sub>4</sub> in solution of PC and FEC (V<sub>(PC)</sub>:V<sub>(FEC)</sub>=7:3) sodium foil with a diameter of 12 mm, and glass microfiber filter with a diameter of 16 mm was applied as electrolyte, counter electrode, and separator, respectively. CR2032 coin cells used for electrochemical test were assembled in an Ar-filled glovebox (MIKROUNA universal 2440-750) with water and oxygen contents  $\leq 0.1$  ppm. Cyclic voltammetry was performed on an AUTOLAB M204 electrochemical workstation. Galvanostatic

charge-discharge tests were conducted on a battery test system (NEWARE CT-4008).

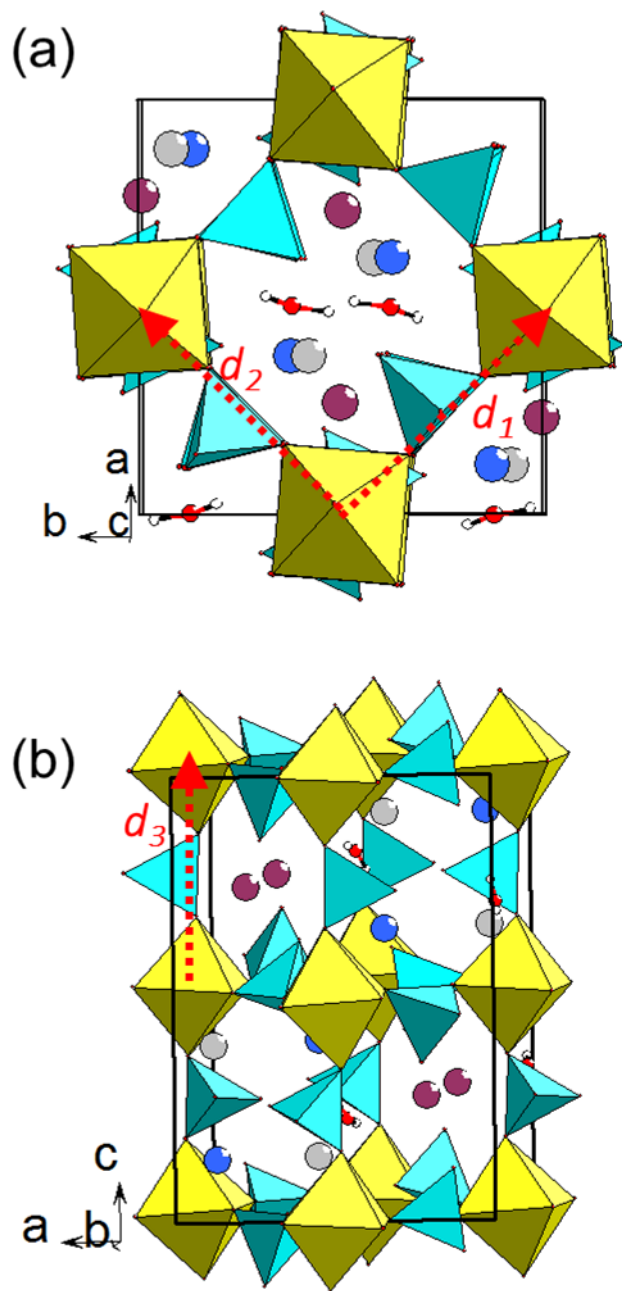

**Figure S1.** Structure of *I*. Unit cell projected (a) along the *c*-axis. (b) along the *b*-axis. FeO<sub>6</sub> octahedra yellow, SO<sub>4</sub> tetrahedra light blue. The three distinct extra framework Na<sup>+</sup> sites are shown in different colours. The directions of *d*<sub>1</sub>, *d*<sub>2</sub> and *d*<sub>3</sub> are indicated by red dotted arrows.

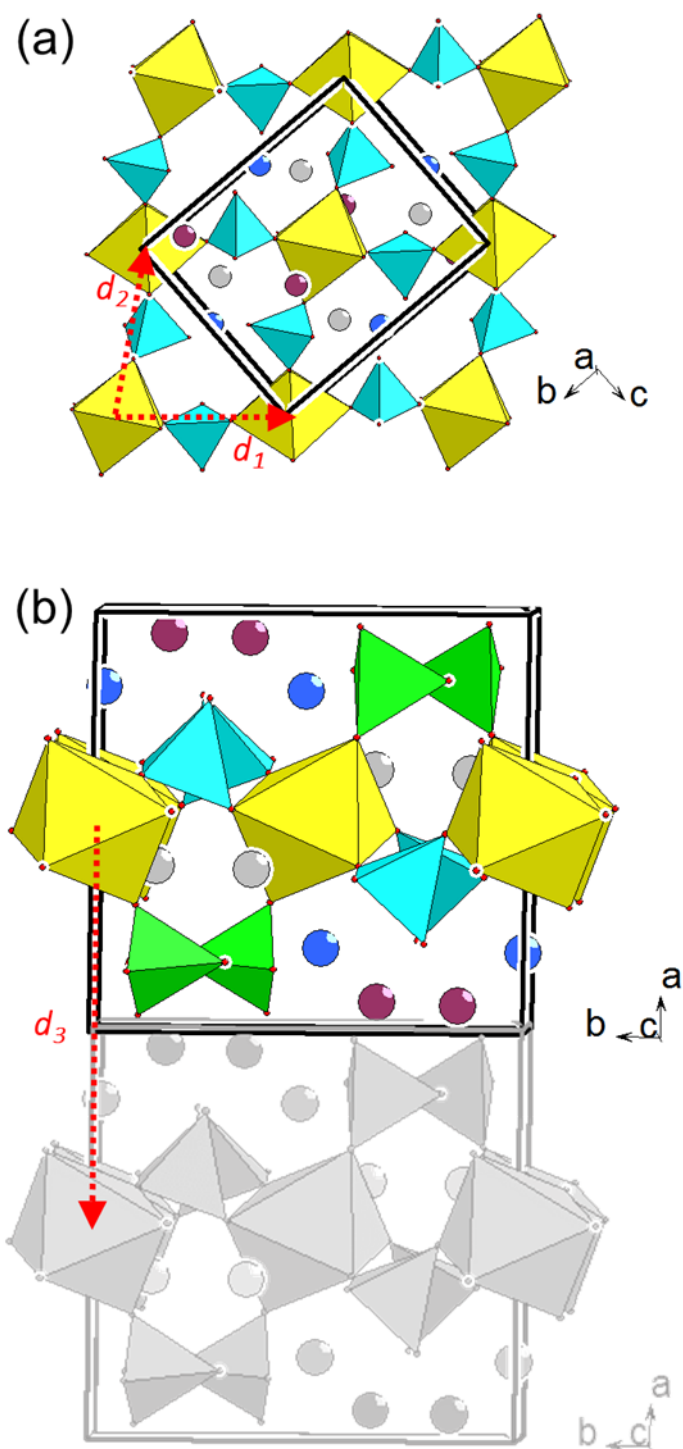

**Figure S2.** Structure of *II*. Single perovskite like layer showing (a) view perpendicular to the layer (b) view parallel to a single layer.  $\text{FeO}_6$  octahedra yellow, in-layer  $\text{SO}_4$  tetrahedra light blue, apical  $\text{SO}_4$  tetrahedra green; the three distinct  $\text{Na}^+$  sites are shown in different colours. Note that the apical  $\text{SO}_4$  groups have been omitted in (a) to show more clearly the topology of the perovskite-like layer. The gray unit cell in (b) indicates an adjacent layer. The red dotted arrows show the directions of  $d_1$ ,  $d_2$  and  $d_3$ .



**Table S1.** Crystallographic information of crystal *I*, *II* and *III*

|                                               | <i>I</i>                                                             | <i>II</i>                                         | <i>III</i>                                                                      |
|-----------------------------------------------|----------------------------------------------------------------------|---------------------------------------------------|---------------------------------------------------------------------------------|
| Formula                                       | Na <sub>3</sub> Fe(SO <sub>4</sub> ) <sub>3</sub> · H <sub>2</sub> O | Na <sub>6</sub> Fe(SO <sub>4</sub> ) <sub>4</sub> | Na <sub>12</sub> Fe <sub>3</sub> (SO <sub>4</sub> ) <sub>6</sub> F <sub>8</sub> |
| ICSD No.                                      | 2031475                                                              | 2050477                                           | 2099156                                                                         |
| Mr (g/mol)                                    | 431.02                                                               | 578.03                                            | 1171.79                                                                         |
| Crystal system                                | Monoclinic                                                           | Monoclinic                                        | Triclinic                                                                       |
| Space group                                   | <i>P</i> 2 <sub>1</sub> / <i>n</i>                                   | <i>P</i> 2 <sub>1</sub> / <i>c</i>                | <i>P</i> -1                                                                     |
| <i>a</i> (Å)                                  | 9.1253(7)                                                            | 9.684(3)                                          | 9.4765(8)                                                                       |
| <i>b</i> (Å)                                  | 8.8443(7)                                                            | 9.259(3)                                          | 9.5081(9)                                                                       |
| <i>c</i> (Å)                                  | 12.6798(11)                                                          | 8.244(2)                                          | 9.6072(8)                                                                       |
| $\alpha$ (degree)                             | 90                                                                   | 90                                                | 113.231(3)                                                                      |
| $\beta$ (degree)                              | 90.442(3)                                                            | 113.359(8)                                        | 105.646(2)                                                                      |
| $\gamma$ (degree)                             | 90                                                                   | 90                                                | 108.917(2)                                                                      |
| <i>V</i> (Å <sup>3</sup> )                    | 511.66(1)                                                            | 678.6(3)                                          | 669.18(1)                                                                       |
| <i>Z</i>                                      | 2                                                                    | 2                                                 | 1                                                                               |
| <i>F</i> (000)                                | 852                                                                  | 568                                               | 570                                                                             |
| <i>d</i> <sub>calc</sub> (g/cm <sup>3</sup> ) | 2.798                                                                | 2.829                                             | 2.908                                                                           |
| $\theta$ range (degree)                       | 2.740-27.851                                                         | 2.291-27.134                                      | 2.555-27.099                                                                    |
| No. of reflections                            | 6381                                                                 | 5950                                              | 14846                                                                           |
| No. of refined parameters                     | 192                                                                  | 126                                               | 244                                                                             |
| R (all data)                                  | 0.1147/0.1358                                                        | 0.0548/0.0877                                     | 0.0356/0.0669                                                                   |
| Final R [ <i>I</i> > 2 $\sigma$ ( <i>I</i> )] | 0.0613/0.1091                                                        | 0.0381/0.0781                                     | 0.0275/0.0622                                                                   |
| Goodness-of-fit on F <sup>2</sup>             | 1.093                                                                | 1.033                                             | 1.017                                                                           |

**Table S2.** Atomic parameters of crystal *I*.

| Atom | Ox. | Wyck. | Site | $x/a$       | $y/b$       | $z/c$       |
|------|-----|-------|------|-------------|-------------|-------------|
| Fe1  | +3  | 2c    | -1   | 1/2         | 0           | 1/2         |
| Fe2  | +3  | 2d    | -1   | 1.00000     | 1/2         | 1/2         |
| S1   | +6  | 4e    | 1    | 0.30898(18) | 0.30924(18) | 0.49362(13) |
| S2   | +6  | 4e    | 1    | 0.92856(18) | 0.54380(19) | 0.25124(13) |
| S3   | +6  | 4e    | 1    | 0.77910(18) | 0.21675(18) | 0.55177(14) |
| Na1  | +1  | 4e    | 1    | 0.3813(3)   | 0.6245(3)   | 0.6315(2)   |
| Na2  | +1  | 4e    | 1    | 1.1179(3)   | 0.0782(3)   | 0.6093(2)   |
| Na3  | +1  | 4e    | 1    | 0.2686(3)   | 0.5064(3)   | 0.2509(2)   |
| O1   | -2  | 4e    | 1    | 1.0246(5)   | 0.5120(5)   | 0.1583(3)   |
| O2   | -2  | 4e    | 1    | 0.8322(5)   | 0.3517(5)   | 0.4925(3)   |
| O3   | -2  | 4e    | 1    | 0.1461(5)   | 0.3281(5)   | 0.5058(3)   |
| O4   | -2  | 4e    | 1    | 0.3297(5)   | 0.1412(5)   | 0.5077(4)   |
| O5   | -2  | 4e    | 1    | 1.0179(5)   | 0.4872(5)   | 0.3433(3)   |
| O6   | -2  | 4e    | 1    | 0.9064(6)   | 0.7049(5)   | 0.2622(4)   |
| O7   | -2  | 4e    | 1    | 0.6424(5)   | 0.1727(5)   | 0.4914(4)   |
| O8   | -2  | 4e    | 1    | 0.3545(6)   | 0.3560(5)   | 0.3895(4)   |
| O9   | -2  | 4e    | 1    | 0.3873(6)   | 0.3860(5)   | 0.5765(4)   |
| O10  | -2  | 4e    | 1    | 0.7953(5)   | 0.4581(6)   | 0.2433(4)   |
| O11  | -2  | 4e    | 1    | 0.8840(5)   | 0.0954(5)   | 0.5438(4)   |
| O12  | -2  | 4e    | 1    | 0.7458(6)   | 0.2535(6)   | 0.6598(4)   |
| O13  | -2  | 4e    | 1    | 1.0024(6)   | -0.1253(6)  | 0.7072(4)   |
| H1   | +1  | 4e    | 1    | 1.026(9)    | -0.190(6)   | 0.753(4)    |
| H2   | +1  | 4e    | 1    | 0.988(9)    | -0.035(3)   | 0.691(5)    |

**Table S3.** Atomic parameters of crystal *II*.

| Atom | Ox. | Wyck. | Site | $x/a$       | $y/b$       | $z/c$       |
|------|-----|-------|------|-------------|-------------|-------------|
| Fe   | +2  | 2b    | -1   | 1/2         | 1/2         | 1/2         |
| S1   | +6  | 4e    | 1    | 0.35725(10) | 0.19721(10) | 0.28096(12) |
| S2   | +6  | 4e    | 1    | 0.84141(10) | 0.3489(1)   | 0.65996(12) |
| Na1  | +1  | 4e    | 1    | 1.18710(17) | 0.48801(16) | 1.0325(2)   |
| Na2  | +1  | 4e    | 1    | 0.61478(19) | 0.36561(18) | 0.1883(2)   |
| Na3  | +1  | 4e    | 1    | 0.9354(2)   | 0.65184(17) | 0.5827(2)   |
| O1   | -2  | 4e    | 1    | 0.7001(3)   | 0.3995(3)   | 0.6749(3)   |
| O2   | -2  | 4e    | 1    | 0.8358(3)   | 0.1908(3)   | 0.6464(3)   |
| O3   | -2  | 4e    | 1    | 0.4733(3)   | 0.3126(3)   | 0.3463(4)   |
| O4   | -2  | 4e    | 1    | 0.3651(3)   | 0.1060(3)   | 0.4298(3)   |
| O5   | -2  | 4e    | 1    | 0.8570(3)   | 0.4128(3)   | 0.5064(4)   |
| O6   | -2  | 4e    | 1    | 0.3918(3)   | 0.1081(3)   | 0.1546(4)   |
| O7   | -2  | 4e    | 1    | 0.2084(3)   | 0.2636(3)   | 0.1955(4)   |
| O8   | -2  | 4e    | 1    | 0.9658(3)   | 0.3932(3)   | 0.8241(4)   |

**Table S4.** Atomic parameters of crystal *III*.

| Atom | Ox. | Wyck. | Site | x/a          | y/b          | z/c          |
|------|-----|-------|------|--------------|--------------|--------------|
| Fe1  | +3  | 1c    | -1   | 0            | 1/2          | 0            |
| Fe2  | +3  | 1b    | -1   | 0            | 0            | 1/2          |
| Fe3  | +2  | 1h    | -1   | 1/2          | 1/2          | 1/2          |
| S1   | +6  | 2i    | 1    | 0.53414(8)   | 0.83001(8)   | 0.81171(8)   |
| S2   | +6  | 2i    | 1    | 0.08964(8)   | 0.25700(9)   | 0.35619(8)   |
| S3   | +6  | 2i    | 1    | 0.38928(8)   | 0.62735(9)   | 0.22698(8)   |
| Na1  | +1  | 2i    | 1    | 0.89171(14)  | 0.81975(15)  | 1.01930(15)  |
| Na2  | +1  | 2i    | 1    | 0.32338(15)  | -0.00120(15) | 0.36537(15)  |
| Na3  | +1  | 2i    | 1    | 0.33675(14)  | 1.07265(15)  | 0.78516(15)  |
| Na4  | +1  | 2i    | 1    | 0.22203(14)  | 0.78207(15)  | 0.92245(15)  |
| Na5  | +1  | 2i    | 1    | -0.15704(16) | 0.35107(17)  | -0.44250(16) |
| Na6  | +1  | 2i    | 1    | 0.29936(15)  | 0.44557(15)  | 0.79397(16)  |
| F1   | -1  | 2i    | 1    | 0.10815(19)  | 0.7501(2)    | 0.0998(2)    |
| F2   | -1  | 2i    | 1    | 0.14063(19)  | 0.1599(2)    | 0.74130(19)  |
| F3   | -1  | 2i    | 1    | 0.16847(19)  | -0.0732(2)   | 0.4972(2)    |
| F4   | -1  | 2i    | 1    | 0.06674(19)  | 0.4836(2)    | -0.1765(2)   |
| O1   | -2  | 2i    | 1    | 0.5670(2)    | 0.7498(2)    | 0.6649(2)    |
| O2   | -2  | 2i    | 1    | 0.5287(3)    | 0.9855(3)    | 0.8187(3)    |
| O3   | -2  | 2i    | 1    | 0.3759(2)    | 0.7073(3)    | 0.7868(3)    |
| O4   | -2  | 2i    | 1    | 0.6742(3)    | 0.8870(3)    | 0.9687(3)    |
| O5   | -2  | 2i    | 1    | 0.2350(2)    | 0.4258(2)    | 0.4254(2)    |
| O6   | -2  | 2i    | 1    | 0.1330(2)    | 0.1933(3)    | 0.4732(3)    |
| O7   | -2  | 2i    | 1    | 0.0512(3)    | 0.1290(3)    | 0.1859(3)    |
| O8   | -2  | 2i    | 1    | -0.0550(3)   | 0.2824(3)    | 0.3545(3)    |
| O9   | -2  | 2i    | 1    | 0.2052(2)    | 0.4982(3)    | 0.1338(3)    |
| O10  | -2  | 2i    | 1    | 0.4787(2)    | 0.5510(2)    | 0.2953(2)    |
| O11  | -2  | 2i    | 1    | 0.4170(3)    | 0.7894(3)    | 0.3640(3)    |
| O12  | -2  | 2i    | 1    | 0.4421(3)    | 0.6533(3)    | 0.1052(3)    |

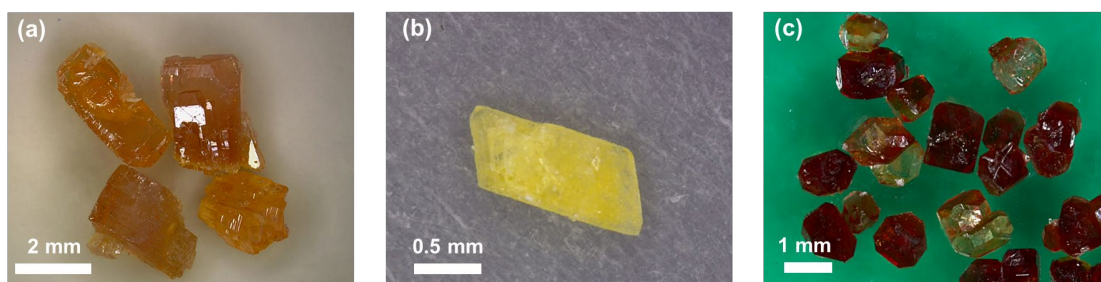

**Figure S3.** Photo of crystallites of (a) *I*, (b) *II*, (c) *III*.

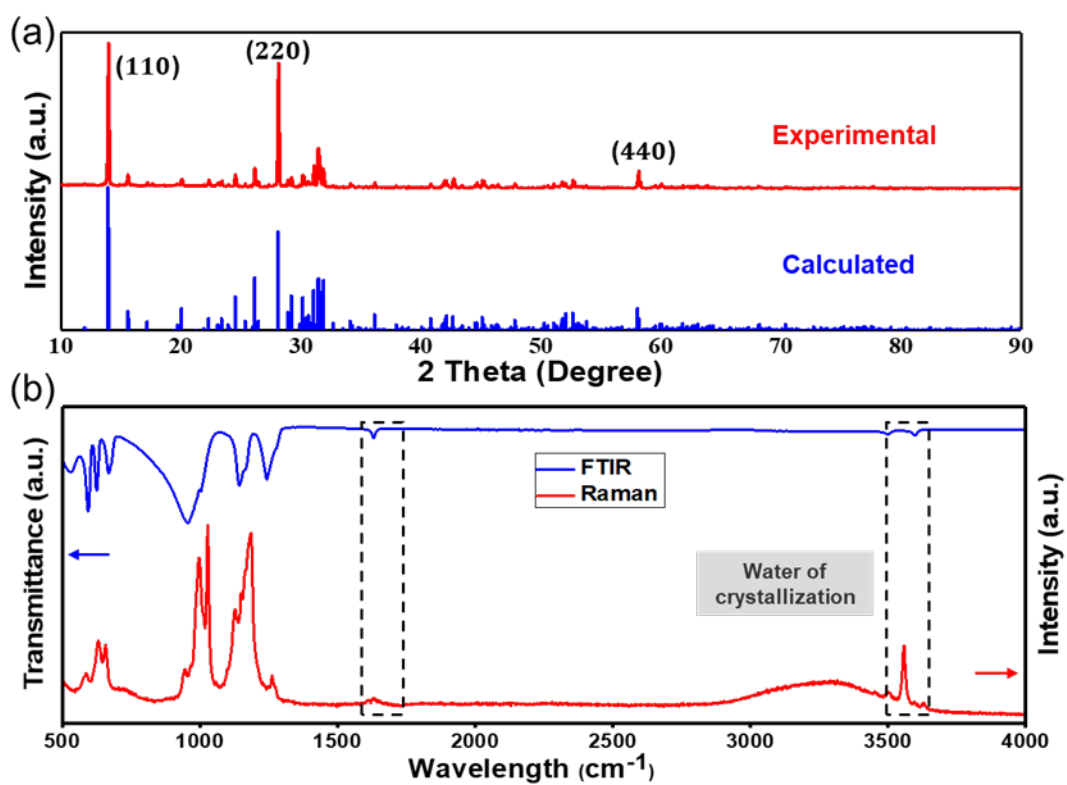

**Figure S4.** Basic characterisation of crystal *I*. Powder XRD pattern (a), Raman and FTIR spectra (b).

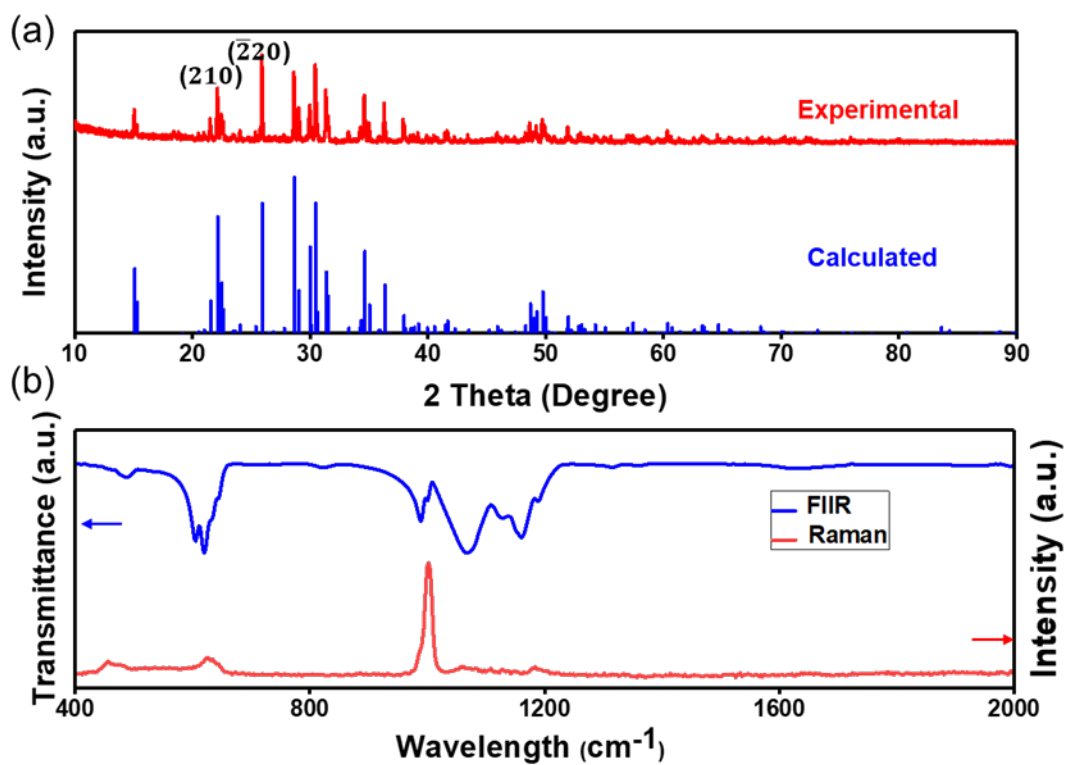

**Figure S5.** Basic characterisation of crystal *II*. Powder XRD pattern(a), Raman and FTIR spectra (b).

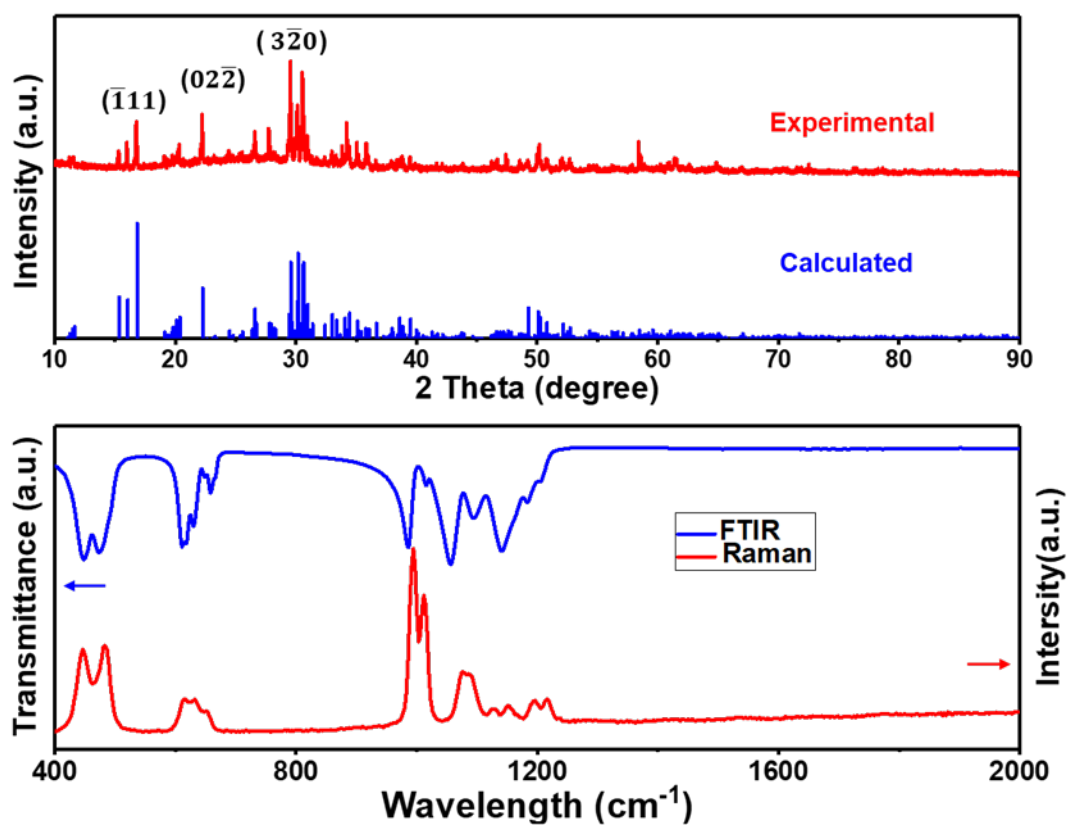

**Figure S6.** Basic characterisation of crystal *III*. Powder XRD pattern (a), Raman and FTIR spectra (b).

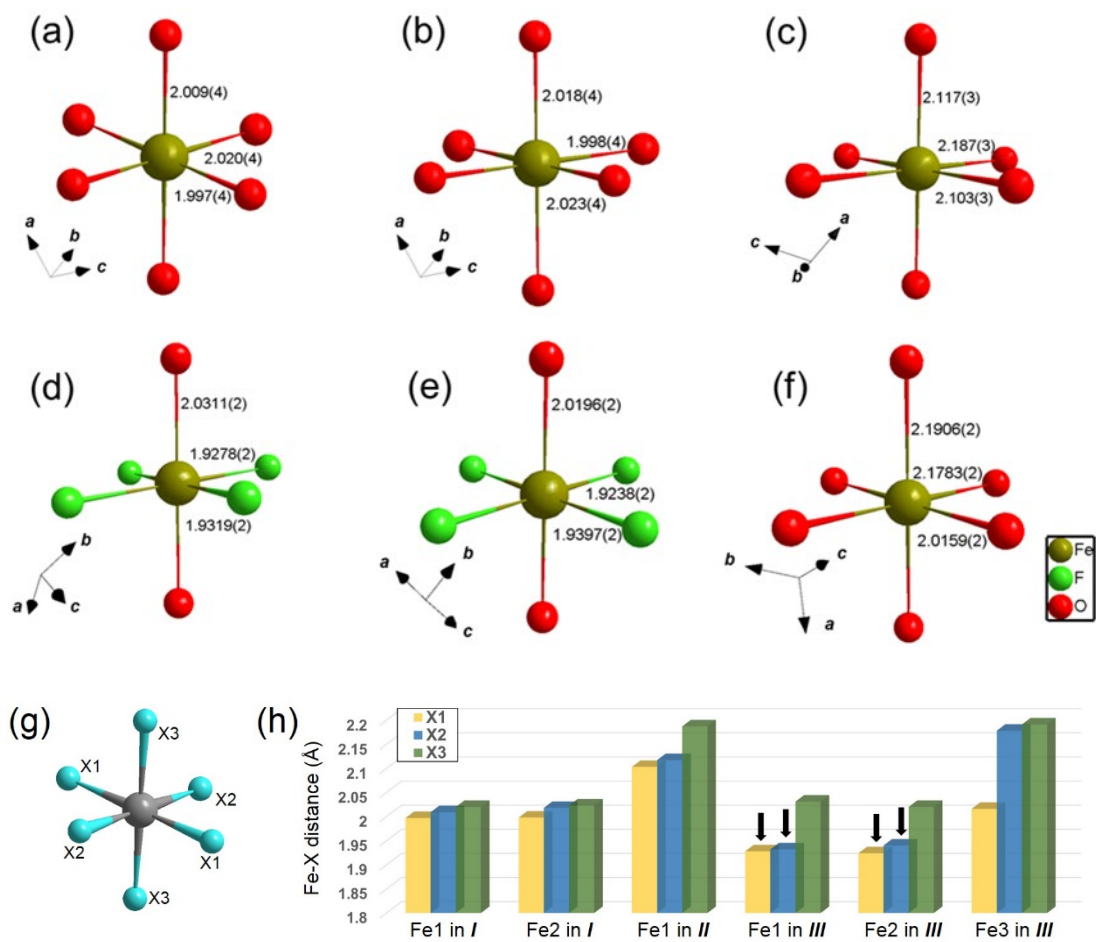

**Figure S7.** Fe environment in *I* (a-b), *II* (c), and *III* (d-f), (g) generalized FeX<sub>6</sub> environment and (h) corresponding Fe-X bond length.



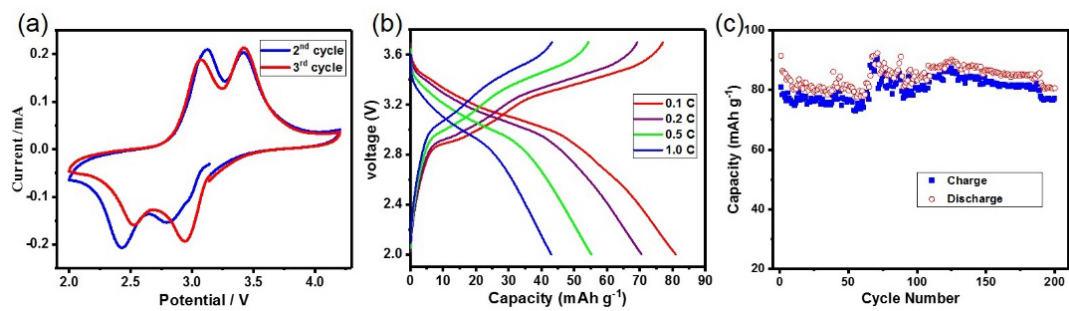

**Figure S8.** Electrochemical properties of *I*. (a) Typical CV curve, (b) Charge-discharge curves, (c) Cycling performance at 0.2 C.
